# Supplementary material for: Highly-Selective Analytical Strategy for 90 Pesticides and Metabolites Residues in Fish and Shrimp Samples
Source: MDPI journal article supplement (doi:10.3390/molecules28104235), 2023-05-22
Supplement: s1 [file s1]

# Highly-selective analytical strategy for 90 pesticides and metabolites residues in fish and shrimp samples

Yage Guo<sup>1</sup>, Jun Xie<sup>1</sup>, Fengshou Dong<sup>1</sup>, Xiaohu Wu<sup>1</sup>, Xinglu Pan<sup>1</sup>, Yongquan Zheng<sup>1</sup>, Jie Zhang<sup>2,\*</sup>, Jun Xu<sup>1,\*</sup>

*1 State Key Laboratory for Biology of Plant Diseases and Insect Pests, Institute of Plant Protection, Chinese Academy of Agricultural Sciences, Beijing, 100193, P. R. China*

*2 Institute of Zoology, Chinese Academy of Sciences, Beijing 100101, P. R. China*

\*Correspondence:

Jun Xu,

E-mail address: junxu1@ippcaas.cn

Tel.: +86 10 62815938; fax: +86 10 62815938

Jie Zhang,

E-mail address: zhangjie@ioz.ac.cn

## List of Figures and Tables

Table S1 Experimental parameters and HPLC–MS/MS conditions of 90 pesticides and metabolites in ESI

Table S2 Inter RSDs and matrix effect of 90 pesticides and metabolites in grass carp and prawn samples

Table S3 Acute and chronic risk assessment of detected pesticides in prawn samples

Table S4 The gradient of mobile phase for the instrumental analysis by HPLC-MS/MS.

Figure S1 Total ion response through MRM mode and dynamic MRM mode (red: MRM; blue, dMRM mode)

Table S1 Experimental parameters and HPLC–MS/MS conditions of 90 pesticides and metabolites in ESI

| Analytes               | mode | Retention<br>Time/min | CAS         | Precursor<br>ion(m/z) | Frag<br>(V) | Quantitative<br>ion (m/z) | CE (V)<br>Quant | Qualitative<br>ion (m/z) | CE (V)<br>Qual |
|------------------------|------|-----------------------|-------------|-----------------------|-------------|---------------------------|-----------------|--------------------------|----------------|
| Chlorpyrifos           | +    | 13.22                 | 2921-90-2   | 349.9                 | 90          | 197.9                     | 22              | 97                       | 36             |
| Phoxim                 | +    | 12.12                 | 14816-18-3  | 299.1                 | 80          | 129.2                     | 10              | 77                       | 35             |
| Triazophos             | +    | 9.57                  | 24017-47-8  | 314.1                 | 110         | 162                       | 21              | 119.1                    | 41             |
| Malathion              | +    | 9.49                  | 121-75-5    | 331                   | 80          | 126.9                     | 6               | 125.1                    | 34             |
| Phorate                | +    | 11.35                 | 298-02-2    | 261.1                 | 53          | 199                       | 3               | 75.1                     | 9              |
| PhorateSulfone         | +    | 6.88                  | 2588/4/7    | 293                   | 61          | 171                       | 8               | 97                       | 42             |
| Phorat-sulfoxide       | +    | 4.38                  | 2588/3/6    | 277                   | 58          | 199                       | 7               | 97                       | 42             |
| Isocarbophos           | +    | 6.85                  | 24353-61-5  | 230.9                 | 105         | 121.1                     | 21              | 65.1                     | 47             |
| Profenofos             | +    | 11.47                 | 41198-08-7  | 373.1                 | 110         | 344.8                     | 11              | 128.1                    | 55             |
| Parathion              | +    | 9.58                  | 56-38-2     | 314                   | 75          | 162.1                     | 21              | 119.2                    | 43             |
| Parathion-methyl       | +    | 9.90                  | 298-00-0    | 281                   | 85          | 160.1                     | 15              | 187.9                    | 5              |
| Methamidophos          | +    | 12.92                 | 10256-92-6  | 142                   | 48          | 125                       | 13              | 94                       | 13             |
| Acephate               | +    | 1.09                  | 30560-19-1  | 143                   | 100         | 95                        | 17              | 65                       | 45             |
| Terbufos               | +    | 12.92                 | 13071-79-9  | 233                   | 70          | 198.9                     | 2               | 186.9                    | 5              |
| Isofenphos-methyl      | +    | 11.19                 | 99675-03-3  | 354.1                 | 90          | 252.8                     | 16              | 213.9                    | 33             |
| Fosthiazate            | +    | 4.29                  | 98886-88-3  | 284                   | 90          | 228.1                     | 5               | 104.1                    | 20             |
| Isazofos               | +    | 9.83                  | 42509-80-8  | 314                   | 79          | 162                       | 15              | 120                      | 30             |
| Dichlorvos             | +    | 3.70                  | 62-73-7     | 221                   | 100         | 109                       | 12              | 79                       | 24             |
| Dipterex               | +    | 2.64                  | 52-68-6     | 257                   | 105         | 221                       | 7               | 109                      | 15             |
| Omethoate              | +    | 1.09                  | 1113-02-6   | 213.9                 | 70          | 125                       | 22              | 109                      | 32             |
| Carbofuran             | +    | 3.96                  | 99485-76-4  | 222                   | 66          | 164.8                     | 13              | 123                      | 21             |
| 3-hydroxycarbofuran    | +    | 2.71                  | 16655-82-6  | 238.1                 | 109         | 163.1                     | 9               | 107.1                    | 32             |
| Aldicarb               | +    | 3.29                  | 116-06-3    | 116                   | 85          | 89.1                      | 7               | 70.1                     | 7              |
| Aldicarb-Sulfone       | +    | 2.47                  | 1646-88-4   | 223.1                 | 110         | 86.1                      | 13              | 76.1                     | 5              |
| Aldicarb-Sulfoxide     | +    | 2.34                  | 1646-87-3   | 207                   | 50          | 132.1                     | 1               | 89.1                     | 11             |
| Methomyl               | +    | 2.54                  | 16752-77-5  | 163.1                 | 60          | 106.1                     | 5               | 88.1                     | 5              |
| Isoprocab              | +    | 4.91                  | 2631-40-5   | 194.1                 | 86          | 95                        | 13              | 137.1                    | 5              |
| Fenpropathrin          | +    | 13.21                 | 39515-41-8  | 350.2                 | 66          | 125.1                     | 15              | 97.1                     | 37             |
| Chloantraniliprole     | +    | 6.17                  | 500008-45-7 | 482                   | 104         | 284                       | 11              | 112                      | 81             |
| Flubendiamide          | —    | 11.69                 | 272451-65-7 | 681.01                | 120         | 271.9                     | 13              | 254                      | 29             |
| Acetamiprid            | +    | 3.04                  | 135410-20-7 | 223.1                 | 120         | 126                       | 21              | 56.2                     | 17             |
| Imidacloprid           | +    | 2.90                  | 138261-41-3 | 256.1                 | 120         | 209                       | 13              | 175.1                    | 21             |
| Thiamethoxam           | +    | 2.62                  | 153719-23-4 | 292                   | 52          | 211                       | 5               | 181                      | 25             |
| Clothianidin           | +    | 2.81                  | 210880-92-5 | 250                   | 77          | 131.8                     | 20              | 168.7                    | 10             |
| Fipronil               | —    | 12.16                 | 120068-37-3 | 435                   | 116         | 329.9                     | 13              | 249.9                    | 29             |
| Fipronil-Sufone        | —    | 13.43                 | 120068-36-2 | 450.9                 | 116         | 414.8                     | 15              | 282                      | 29             |
| Fipronil-Sufoxide      | —    | 13.27                 | 120067-83-6 | 418.9                 | 98          | 261.8                     | 10              | 418.9                    | 30             |
| Buprofezin             | +    | 4.48                  | 69327-76-0  | 306.2                 | 95          | 201.1                     | 9               | 57.1                     | 25             |
| Hexaflumuron           | —    | 13.06                 | 86479-06-3  | 458.9                 | 115         | 438.9                     | 9               | 175                      | 41             |
| Hydroxy Chlorothalonil | —    | 14.00                 | 28343-61-5  | 244.9                 | 75          | 181.9                     | 33              | 174.9                    | 29             |

|                        |   |       |             |        |     |       |    |       |    |
|------------------------|---|-------|-------------|--------|-----|-------|----|-------|----|
| Tricyclazole           | + | 3.10  | 41814-78-2  | 190.1  | 115 | 163.1 | 25 | 136   | 33 |
| Propiconazole          | + | 9.38  | 60207-90-1  | 342.08 | 91  | 158.9 | 37 | 69.1  | 21 |
| Difenoconazole         | + | 10.96 | 119446-68-3 | 406    | 136 | 250.9 | 28 | 188   | 52 |
| Triadimefon            | + | 8.54  | 43121-43-3  | 294.1  | 105 | 69.1  | 21 | 197.1 | 15 |
| Hexaconazole           | + | 8.55  | 79983-71-4  | 314.08 | 120 | 70.1  | 17 | 158.9 | 41 |
| Epoxiconazole          | + | 8.67  | 135319-73-2 | 330    | 115 | 121.1 | 23 | 101   | 59 |
| Tebuconazole           | + | 8.89  | 107534-96-3 | 308.1  | 120 | 70.1  | 25 | 125.1 | 45 |
| Carbendazim            | + | 1.10  | 120068-37-3 | 192.1  | 100 | 160   | 21 | 132.1 | 37 |
| Procymidone            | + | 9.52  | 32809-16-8  | 284    | 88  | 256.1 | 17 | 95.1  | 25 |
| Azoxystrobin           | + | 8.53  | 131860-33-8 | 404.1  | 105 | 372.1 | 13 | 329.1 | 33 |
| Pyraclostrobin         | + | 11.60 | 175013-18-0 | 388.1  | 68  | 194.1 | 9  | 163.1 | 25 |
| Pyrimethanil           | + | 3.19  | 53112-28-0  | 200.1  | 130 | 107.1 | 27 | 82.1  | 30 |
| Isoprothiolane         | + | 8.85  | 50512-35-1  | 291.1  | 76  | 231   | 9  | 189   | 21 |
| Alachlor               | + | 12.50 | 15972-60-8  | 270.1  | 71  | 238.1 | 9  | 162   | 23 |
| Acetochlor             | + | 8.62  | 34256-82-1  | 270.1  | 75  | 224   | 7  | 148   | 19 |
| Bensulfuron methyl     | + | 6.61  | 83055-99-6  | 411.1  | 90  | 182   | 20 | 149.1 | 20 |
| Pyrazosulfuron-ethyl   | + | 8.21  | 93697-74-6  | 415.1  | 81  | 182   | 20 | 83    | 66 |
| Tribenuron-methyl      | + | 7.02  | 101200-48-0 | 396.1  | 75  | 181.1 | 19 | 155.1 | 13 |
| Atrazine               | + | 4.43  | 1912-24-9   | 216.1  | 107 | 174   | 19 | 96.1  | 27 |
| Desethylatrazine       | + | 2.79  | 6190-65-4   | 188    | 98  | 146.1 | 17 | 104   | 30 |
| Desisopropylatrazine   | + | 2.50  | 1007-28-9   | 174    | 96  | 96.1  | 20 | 104   | 26 |
| Hydroxyatrazine        | + | 1.10  | 2163-68-0   | 198.1  | 107 | 156   | 19 | 86.1  | 26 |
| Pendimethalin          | + | 13.40 | 40478-42-1  | 282.1  | 76  | 212   | 8  | 194   | 18 |
| Clomazone              | + | 5.71  | 81777-89-1  | 240    | 91  | 125   | 21 | 89.1  | 57 |
| Propargite             | + | 13.50 | 2312-35-8   | 368.1  | 62  | 231.1 | 7  | 175.1 | 14 |
| Pyridaben              | + | 13.59 | 96489-71-3  | 365.1  | 73  | 309   | 11 | 147.1 | 27 |
| Paclobutrazol          | + | 6.72  | 76738-62-0  | 294.1  | 76  | 70.1  | 21 | 125   | 43 |
| Forchlorfenuron        | + | 5.58  | 68157-60-8  | 248    | 82  | 129   | 17 | 93.1  | 44 |
| Carbaryl               | + | 4.68  | 63-25-2     | 202    | 65  | 145   | 2  | 127.1 | 28 |
| Indoxacarb             | + | 13.03 | 144171-61-9 | 528.1  | 105 | 249   | 16 | 203   | 47 |
| Dinotefuran            | + | 2.36  | 165252-70-0 | 203.12 | 60  | 129.1 | 10 | 87.1  | 19 |
| Emamectin-benzoate b1a | + | 8.37  | 155569-91-8 | 886.4  | 140 | 157.9 | 50 | 81.6  | 80 |
| Emamectin-benzoate b1b | + | 7.48  | 155569-91-8 | 872.6  | 140 | 158   | 50 | 82    | 80 |
| Methoxyfenozide        | + | 9.53  | 161050-58-4 | 313.1  | 58  | 149.1 | 11 | 91.1  | 46 |
| Prothioconazole        | + | 9.38  | 178928-70-6 | 344    | 95  | 154   | 33 | 189.1 | 23 |
| Ametoctradin           | + | 7.24  | 865318-97-4 | 276.2  | 110 | 176   | 46 | 149   | 45 |
| Boscalid               | + | 8.71  | 188425-85-6 | 343    | 85  | 307.1 | 21 | 272   | 37 |
| Flutolanil             | + | 10.15 | 66332-96-5  | 324.1  | 99  | 242.1 | 19 | 262.1 | 29 |
| Fomesafen              | — | 11.26 | 72178-02-0  | 437    | 119 | 195   | 43 | 222   | 35 |
| Prometryn              | + | 3.03  | 7287-19-6   | 242.2  | 125 | 158.1 | 25 | 200.1 | 19 |
| Imazethapyr            | + | 3.19  | 81335-77-5  | 290.2  | 119 | 245.1 | 22 | 177   | 30 |
| Nicosulfuron           | + | 6.61  | 686-897-5   | 411.1  | 106 | 182   | 20 | 213   | 14 |
| Sulfometuron-methyl    | + | 4.60  | 74222-97-2  | 365.1  | 78  | 150.1 | 17 | 107.1 | 51 |
| Mesotrione             | + | 2.70  | 104206-82-8 | 293    | 133 | 214   | 37 | 202   | 36 |

|              |   |       |             |       |     |       |    |       |    |
|--------------|---|-------|-------------|-------|-----|-------|----|-------|----|
| Diuron       | + | 5.56  | 330-54-1    | 233   | 74  | 72.1  | 20 | 159.9 | 32 |
| Pretilachlor | + | 11.83 | 51218-49-6  | 312.1 | 75  | 252.1 | 17 | 176.1 | 32 |
| Metolachlor  | + | 8.25  | 51218-45-2  | 284.1 | 101 | 252.1 | 15 | 176.1 | 29 |
| Flumetsulam  | + | 3.28  | 98967-40-9  | 326   | 104 | 129   | 27 | 109   | 67 |
| penoxsulam   | + | 7.53  | 219714-96-2 | 484   | 154 | 195   | 31 | 164   | 37 |
| Saflufenacil | + | 9.32  | 372137-35-4 | 501   | 163 | 198   | 55 | 349   | 30 |

Table S2 Inter RSDs and matrix effect of 90 pesticides and metabolites in grass carp and prawn samples

| Analytes               | grass carp (Inter RSD, %) |      |      |      | prawn (Inter RSD, %) |      |      |      | Matrix effect (%) |       |
|------------------------|---------------------------|------|------|------|----------------------|------|------|------|-------------------|-------|
|                        | 0.05                      | 0.5  | 5    | 50   | 0.05                 | 0.5  | 5.0  | 50   | Grass carp        | prawn |
| Chlorpyrifos           |                           |      | 10.1 | 6    |                      |      | 12.4 | 3.1  | 14                | 25    |
| Phoxim                 |                           | 9.2  | 6.7  | 11.1 |                      | 0.8  | 9.0  | 1.8  | 17                | 35    |
| Triazophos             |                           | 12.0 | 5.1  | 11.1 |                      | 1.3  | 10.1 | 10.8 | 72                | 76    |
| Malathion              |                           | 14.2 | 9.1  | 9.3  |                      | 7.2  | 11.1 | 9.1  | 39                | 48    |
| Phorate                |                           | 5.3  | 8.1  | 7.3  |                      | 6.5  | 10.5 | 6.5  | 17                | 25    |
| PhorateSulfone         |                           | 9.1  | 3.7  | 9.1  |                      | 1.7  | 9.3  | 8.9  | 51                | 65    |
| Phorat-sulfoxide       | 10.1                      | 13.4 | 6.8  | 11.8 | 16.4                 | 2.4  | 10.8 | 1.1  | 92                | 89    |
| Isocarbophos           | 11.1                      | 11.4 | 1.3  | 7.7  | 16.7                 | 2.3  | 8.7  | 7.1  | 52                | 66    |
| Profenofos             |                           | 1.1  | 5.3  | 7.0  |                      | 0.5  | 9.2  | 7.0  | 34                | 53    |
| Parathion              | 10.7                      | 10.6 | 5.1  | 8.8  |                      | 0.7  | 10.4 | 7.7  | 85                | 69    |
| Parathion-methyl       |                           |      | 7.5  | 6.9  |                      |      | 8.8  | 5.7  | 40                | 115   |
| Methamidophos          |                           |      | 10.8 | 11.1 |                      |      | 14.2 | 12.2 | 28                | 26    |
| Acephate               |                           |      | 12.4 | 8.3  |                      |      | 8.2  | 11.5 | 9                 | 22    |
| Terbufos               |                           |      | 9.0  | 8.9  |                      |      | 14.2 | 8.1  | 31                | 40    |
| Isofenphos-methyl      | 11.0                      | 15.3 | 9.4  | 14.2 | 5.8                  | 1.2  | 1.1  | 14.0 | 10                | 12    |
| Fosthiazate            |                           | 11.7 | 5.7  | 11.2 |                      | 1.4  | 1.2  | 1.9  | 62                | 97    |
| Isazofos               |                           | 6.8  | 11.8 | 13.2 |                      | 10.6 | 12.6 | 2.0  | 86                | 68    |
| Dichlorvos             |                           | 17.1 | 13.8 | 11.5 |                      | 14.1 | 18.4 | 7.7  | 27                | 24    |
| Dipterex               |                           |      | 16.7 | 15.0 |                      |      | 4.8  | 9.2  | 61                | 63    |
| Omethoate              |                           | 7.8  | 4.9  | 8.1  | 12.9                 | 2.4  | 1.2  | 1.4  | 20                | 19    |
| Carbofuran             | 13.2                      | 6.5  | 2.2  | 4.0  |                      | 2.5  | 3.9  | 1.7  | 54                | 59    |
| 3-hydroxycarbofuran    |                           | 6.9  | 7.1  | 9.7  | 13.2                 | 3.5  | 6.0  | 1.8  | 15                | 104   |
| Aldicarb               |                           | 8.2  | 3.1  | 2.0  | 18.3                 | 2.6  | 4.1  | 1.5  | 47                | 51    |
| Aldicarb-Sulfone       |                           |      | 7.1  | 3.1  |                      |      | 13.9 | 1.0  | 11                | 26    |
| Aldicarb-Sulfoxide     |                           | 12.9 | 4.4  | 12.7 | 16.1                 | 0.7  | 2.8  | 3.1  | 10                | 23    |
| Methomyl               |                           | 11.2 | 5.1  | 10.1 | 12.9                 | 3.0  | 1.7  | 8.1  | 33                | 86    |
| Isoprocarb             |                           |      | 10.5 | 8.9  |                      |      | 6.9  | 8.4  | 39                | 55    |
| Fenpropathrin          |                           | 15.5 | 2.9  | 13.1 |                      | 2    | 0.5  | 2.1  | 27                | 16    |
| Chloantraniliprole     |                           | 10.7 | 12.6 | 6.3  |                      | 2.4  | 4.3  | 1.7  | 80                | 154   |
| Flubendiamide          |                           | 9.2  | 3.9  | 4.9  |                      |      | 1.8  | 1.3  | 52                | 41    |
| Acetamiprid            |                           | 3.9  | 9.8  | 2.2  |                      | 15.3 | 9.4  | 2.1  | 39                | 90    |
| Imidacloprid           |                           | 8.5  | 6.2  | 2.3  |                      | 10.0 | 11.5 | 2.3  | 11                | 17    |
| Thiamethoxam           |                           | 8.1  | 11.9 | 2.8  |                      | 8.7  | 1.6  | 3.9  | 15                | 15    |
| Clothianidin           |                           | 13.9 | 14   | 16.9 |                      | 6.3  | 1.9  | 6.5  | 22                | 39    |
| Fipronil               |                           | 14.6 | 7.8  | 12.9 |                      | 6.2  | 4.4  | 4.9  | 104               | 88    |
| Fipronil-Sufone        |                           | 5.2  | 9.1  | 9.5  |                      | 3.0  | 3.7  | 8.5  | 66                | 54    |
| Fipronil-Sufoxide      | 18.9                      | 17.0 | 11.2 | 16.1 | 3.8                  | 0.7  | 1.6  | 2.2  | 90                | 119   |
| Buprofezin             |                           | 12.3 | 5.8  | 9.4  |                      |      | 3.6  | 2.6  | 45                | 51    |
| Hexaflumuron           |                           | 8.0  | 11.6 | 11.3 |                      |      | 4.7  | 14.5 | 47                | 34    |
| Hydroxy Chlorothalonil | 17.2                      | 10.5 | 7.5  | 11.9 | 5.3                  | 2.1  | 10.6 | 1.0  | 11                | 11    |

|                        |      |      |      |      |      |      |      |      |     |     |
|------------------------|------|------|------|------|------|------|------|------|-----|-----|
| Tricyclazole           |      | 12.6 | 12.1 | 16.0 |      | 4.7  | 1.6  | 7.8  | 60  | 58  |
| Propiconazole          | 11.7 | 10.6 | 14.6 | 12.6 | 5.3  | 1.4  | 2.1  | 1.8  | 43  | 39  |
| Difenoconazole         |      | 12.7 | 11.9 | 13.6 |      | 2.1  | 5.2  | 15.6 | 26  | 30  |
| Triadimefon            |      | 12.9 | 14.1 | 14.7 |      | 2.2  | 15.3 | 15.1 | 30  | 31  |
| Hexaconazole           |      | 15.2 | 12.3 | 14.4 |      | 1.4  | 11.3 | 14.4 | 30  | 32  |
| Epoxiconazole          |      | 11.4 | 13.5 | 14.7 |      | 1.5  | 14.5 | 5.2  | 16  | 34  |
| Tebuconazole           | 14.7 | 7.1  | 7.6  | 8.2  | 4.3  | 6.8  | 8.2  | 7.9  | 31  | 30  |
| Carbendazim            |      |      | 5.3  | 13.9 |      | 9.0  | 7.3  | 4.1  | 9   | 13  |
| Procymidone            |      | 9.5  | 6.0  | 10.9 | 3.7  | 1.7  | 1.1  | 10.9 | 73  | 21  |
| Azoxystrobin           | 7.4  | 6.7  | 6.2  | 5.1  |      | 2.6  | 6.6  | 4.8  | 62  | 105 |
| Pyraclostrobin         | 10.2 | 7.7  | 12.7 | 12.3 | 12.3 | 3.7  | 12.5 | 6.3  | 31  | 47  |
| Pyrimethanil           | 11.2 | 9.5  | 5.3  | 10.3 | 5.9  | 10.6 | 6.0  | 10.2 | 39  | 48  |
| Isoprothiolane         |      | 7.8  | 8.0  | 11.3 |      | 6.1  | 2.2  | 11.1 | 55  | 63  |
| Alachlor               |      | 19.1 | 8.2  | 10.3 |      | 6.3  | 6.3  | 14.5 | 11  | 33  |
| Acetochlor             |      | 16.9 | 11.4 | 17.5 | 4.5  | 17.5 | 12.8 | 1.4  | 44  | 65  |
| Bensulfuron methyl     | 5.6  | 6.8  | 11.0 | 8.3  |      | 1.5  | 11.9 | 1.7  | 115 | 93  |
| Pyrazosulfuron-ethyl   |      | 16.9 | 4.7  | 7.0  |      | 1.5  | 1.7  | 6.6  | 92  | 132 |
| Tribenuron-methyl      |      | 14.3 | 9.6  | 13.0 | 7.9  | 3.5  | 0.9  | 5.0  | 29  | 26  |
| Atrazine               |      | 11.4 | 13.9 | 14.7 | 15.2 | 4.9  | 2.8  | 0.9  | 42  | 43  |
| Desethylatrazine       |      | 16.4 | 15.8 | 7.8  |      | 16.1 | 11.9 | 1.4  | 27  | 31  |
| Desisopropylatrazine   |      | 10.6 | 13.9 | 7.1  | 19.7 | 1.4  | 2.9  | 12.1 | 17  | 38  |
| Hydroxyatrazine        |      | 7.2  | 10.3 | 9.2  |      | 8.0  | 12.1 | 4.1  | 16  | 20  |
| Pendimethalin          | 5.7  | 10.0 | 6.9  | 11.7 | 4.4  | 1.8  | 8.3  | 11.4 | 11  | 10  |
| Clomazone              |      | 10.6 | 6.9  | 10.4 |      |      | 12.1 | 4.6  | 86  | 72  |
| Propargite             | 9.0  | 5.9  | 7.3  | 12.8 | 17.2 | 6.9  | 15.9 | 6.4  | 9   | 10  |
| Pyridaben              | 7.4  | 17.0 | 13.6 | 13.7 | 15.9 | 4.4  | 14.7 | 13.8 | 12  | 14  |
| Paclobutrazol          | 18.6 | 2.5  | 6.6  | 2.0  | 6.0  | 1.1  | 7.8  | 1.4  | 44  | 37  |
| Forchlorfenuron        |      | 5.1  | 1.3  | 6.5  |      | 0.8  | 1.2  | 6.1  | 26  | 56  |
| Carbaryl               |      | 19.0 | 9.7  | 7.6  |      | 5.2  | 11.0 | 6.3  | 38  | 43  |
| Indoxacarb             |      | 15.1 | 1.6  | 8.4  |      | 18.5 | 14.5 | 9.4  | 44  | 72  |
| Dinotefuran            |      | 18.6 | 14.8 | 15.0 |      | 3.4  | 1.7  | 8.2  | 10  | 17  |
| Emamectin-benzoate bla |      | 11.5 | 9.9  | 8.6  |      |      | 8.2  | 8.9  | 81  | 58  |
| Emamectin-benzoate bab |      | 12.9 | 8.9  | 13.4 |      | 0.3  | 10.8 | 3.1  | 78  | 64  |
| Methoxyfenozide        |      |      | 3.3  | 15.8 |      |      | 12.3 | 4.5  | 76  | 70  |
| Prothioconazole        |      | 16.2 | 13.8 | 11.6 |      | 3.2  | 2.1  | 1.9  | 39  | 35  |
| Ametoctradin           |      |      | 17.4 | 1.1  |      | 6.6  | 17.3 | 2.1  | 73  | 57  |
| Boscalid               |      | 4.8  | 2.7  | 8.2  |      | 1.5  | 2.6  | 8.2  | 47  | 59  |
| Flutolanil             |      | 4.6  | 2.2  | 7.2  |      |      | 7.8  | 2.9  | 46  | 52  |
| Fomesafen              | 17.6 | 13.9 | 12.5 | 15.2 | 10.8 | 17.4 | 2.8  | 1.2  | 93  | 31  |
| Prometryn              |      | 17.4 | 8.3  | 14.9 |      | 2.8  | 9.5  | 9.8  | 54  | 54  |
| Imazethapyr            | 3.2  | 16.9 | 11.4 | 17.5 | 4.5  | 14.9 | 1.0  | 7.9  | 58  | 45  |
| Nicosulfuron           |      | 12.6 | 8.3  | 16.8 | 9.1  | 14.4 | 1.5  | 16.9 | 111 | 95  |
| Sulfometuron-methyl    |      | 8.7  | 3.9  | 12.0 |      | 11.2 | 8.3  | 2.9  | 70  | 64  |
| Mesotrione             |      | 6.9  | 0.5  | 8.5  | 3.6  | 1.7  | 1.0  | 8.5  | 9   | 18  |

|              |      |      |      |      |      |      |      |      |     |     |
|--------------|------|------|------|------|------|------|------|------|-----|-----|
| Diuron       |      | 5.3  | 14.7 | 9.5  |      | 1.5  | 2.0  | 9.2  | 85  | 91  |
| Pretilachlor | 16.9 | 9.5  | 2.1  | 9.0  | 19.8 | 5.4  | 2.5  | 14.5 | 39  | 56  |
| Metolachlor  | 17.3 | 9.8  | 7.3  | 11.5 | 4.9  | 2.5  | 8.1  | 10.9 | 48  | 71  |
| Flumetsulam  | 8.5  | 3.1  | 2.0  | 4.1  | 18.3 | 5.4  | 3.1  | 3.9  | 76  | 166 |
| Penoxsulam   | 6.8  | 13.4 | 9.7  | 12.0 | 5.5  | 10.1 | 10.8 | 8.2  | 108 | 133 |
| Saflufenacil |      | 14.5 | 8.9  | 12.9 |      | 8.1  | 10.6 | 5.1  | 58  | 166 |



Table S3 Acute and chronic risk assessment of detected pesticides in prawn samples

| Pesticide | Acute risk assessment |                     |                         | Chronic risk assessment |                   |                         |
|-----------|-----------------------|---------------------|-------------------------|-------------------------|-------------------|-------------------------|
|           | ARfD<br>(mg/kg bw)    | IESTI<br>(mg/kg bw) | %HQ <sub>a</sub><br>(%) | ADI<br>(mg/kg bw)       | EDI<br>(mg/kg bw) | %HQ <sub>c</sub><br>(%) |
| atrazine  | 0.1                   | 0.0000029           | 0.0029                  | 0.02                    | 0.000000087       | 0.0004                  |
| prometryn | -                     | 0.0000003           | -                       | 0.04                    | 0.000000087       | 0.0002                  |
| dinuron   | 0.016                 | 0.0000046           | 0.0288                  | 0.003                   | 0.000000867       | 0.0289                  |

ADI and ARfD were obtained from the Joint FAO/WHO Meeting on Pesticide Residues (JMPR)  
(<http://www.fao.org/agriculture/crops/core-themes/theme/pests/lpe/en/>).

Table S4 The gradient of mobile phase for the instrumental analysis by HPLC-MS/MS.

|                   | Time<br>(min)       | Initial | 0.5  | 1.0 | 5.0 | 12.0 | 12.5 | 15.0 | 15.1 | 17.0 |
|-------------------|---------------------|---------|------|-----|-----|------|------|------|------|------|
| Mobile<br>phase A | water<br>(%)        | 98%     | 98%  | 65% | 65% | 40%  | 2%   | 2%   | 98%  | 98%  |
| Mobile<br>phase B | Acetonitrile<br>(%) | 2.0%    | 2.0% | 35% | 35% | 60%  | 98%  | 98%  | 2%   | 2%   |

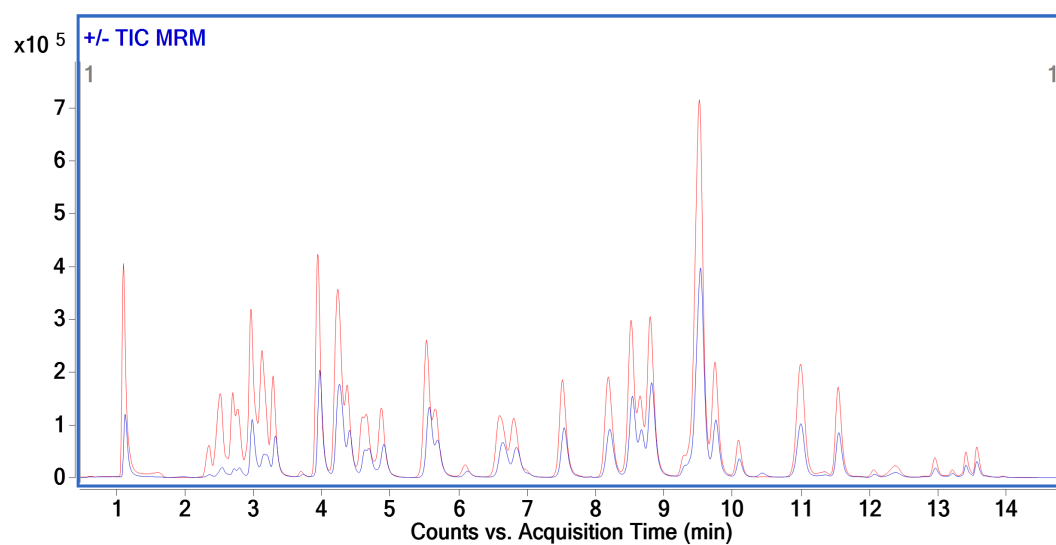

Figure S1 Total ion response through MRM mode and dynamic MRM mode (red: dMRM; blue, MRM mode)
